# Supplementary material
Source: PubMed Central journal article supplement (PMC4793372)
Supplement: siok011349.ww1_default.pdf [file siok011349.ww1_default.pdf]

**Appendix.** Index meta-analyses, search terms, and overlapping studies [posted as supplied by author]

| <b>PubMed ID</b> | <b>Title</b>                                                                                                                     | <b>Search terms (+ AND meta-analysis[ptyp] AND randomi*)</b>                                      | <b>Overlapping PubMed ID</b> |
|------------------|----------------------------------------------------------------------------------------------------------------------------------|---------------------------------------------------------------------------------------------------|------------------------------|
| 19242634         | Bone recovery after zoledronate therapy in thalassemia-induced osteoporosis: meta-analysis and systematic review.                | zoledronate AND thalassemia AND osteoporosis                                                      | NO                           |
| 19517236         | Clinical effectiveness of selective granulocyte, monocyte adsorptive apheresis with the Adacolumn device in ulcerative colitis.  | (GMA apheresis OR (granulocyte AND apheresis) OR (monocyte AND apheresis) AND ulcerative colitis) | NO                           |
| 19703121         | No evidence for switching the antidepressant: systematic review and meta-analysis of RCTs of a common therapeutic strategy.      | (antidepress* OR (depressi* AND treatment)) AND switch*                                           | 17919460                     |
| 19744114         | Placebo-corrected efficacy of modern antiepileptic drugs for refractory epilepsy: systematic review and meta-analysis.           | (antiepilep* OR (epilepsy AND treatment)) AND refractory                                          | 21729036                     |
|                  |                                                                                                                                  |                                                                                                   | 21515509                     |
|                  |                                                                                                                                  |                                                                                                   | 16235282                     |
|                  |                                                                                                                                  |                                                                                                   | 14636332                     |
|                  |                                                                                                                                  |                                                                                                   | 9579887                      |
|                  |                                                                                                                                  |                                                                                                   | 9092956                      |
|                  |                                                                                                                                  |                                                                                                   | 8916746                      |
| 19836274         | Use of non-randomised evidence alongside randomised trials in a systematic review of endovascular aneurysm repair: strengths and | aortic aneurysm AND repair                                                                        | 20816324                     |

|          |                                                                                                                                                 |                                                                               |          |
|----------|-------------------------------------------------------------------------------------------------------------------------------------------------|-------------------------------------------------------------------------------|----------|
|          | limitations.                                                                                                                                    |                                                                               |          |
|          |                                                                                                                                                 |                                                                               | 19849958 |
|          |                                                                                                                                                 |                                                                               | 18658009 |
| 19853947 | Aspirin for primary prevention of cardiovascular events in patients with diabetes: A meta-analysis                                              | aspirin AND diabet*                                                           | 21647746 |
|          |                                                                                                                                                 |                                                                               | 21191260 |
|          |                                                                                                                                                 |                                                                               | 20429671 |
|          |                                                                                                                                                 |                                                                               | 19897665 |
| 19913318 | Differing effect of statins on insulin sensitivity in non-diabetics: a systematic review and meta-analysis.                                     | statin* AND insulin                                                           | NO       |
| 19931204 | Shortened treatment duration in treatment-naive genotype 1 HCV patients with rapid virological response: a meta-analysis.                       | (HCV OR hepatitis C) AND duration AND treatment                               | 21674553 |
| 19996334 | Interval versus continuous training in individuals with chronic obstructive lung disease-a systematic review.                                   | training AND (interval OR continuous) AND copd                                | 22071841 |
|          |                                                                                                                                                 |                                                                               | 15860711 |
| 20009767 | Isometric handgrip exercise and resting blood pressure: a meta-analysis of randomized controlled trials.                                        | handgrip exercise AND (blood pressure OR hypertension)                        | 21896934 |
| 20074867 | A comparison of methadone, buprenorphine and alpha(2) adrenergic agonists for opioid detoxification: a mixed treatment comparison meta-analysis | (methadone OR buprenorphine OR adrenergic agonists) AND opioid detoxification | NO       |
| 20091498 | Clomiphene citrate for unexplained subfertility in                                                                                              | clomiphene AND (subfertility OR infertility OR fertility)                     | NO       |

|          |                                                                                                                                                            |                                                                     |          |
|----------|------------------------------------------------------------------------------------------------------------------------------------------------------------|---------------------------------------------------------------------|----------|
|          | women.                                                                                                                                                     |                                                                     |          |
| 20091512 | Sucrose for analgesia in newborn infants undergoing painful procedures.                                                                                    | sucrose AND (analg* OR anesthesia OR anaesthesia) AND infant*       | 12881929 |
|          |                                                                                                                                                            |                                                                     | 9307163  |
| 20091540 | Endovascular stents for intermittent claudication.                                                                                                         | stent* AND (intermittent claudication OR peripheral artery disease) | 19370653 |
|          |                                                                                                                                                            |                                                                     | 19028778 |
| 20091561 | Manipulation or mobilisation for neck pain.                                                                                                                | (Manipulation OR mobilisation) AND neck pain                        | 22895940 |
|          |                                                                                                                                                            |                                                                     | 20482474 |
| 20091605 | Interventions for preventing hamstring injuries.                                                                                                           | hamstring* AND injur*                                               | NO       |
| 20091615 | Neuraxial anaesthesia for lower-limb revascularization.                                                                                                    | (anaesthesia OR anesthesia) AND limb AND revasculariz*              | 19488536 |
| 20104449 | Effectiveness of standardized ginkgo biloba extract on cognitive symptoms of dementia with a six-month treatment: a bivariate random effect meta-analysis. | ginkgo AND dementia                                                 | 19160216 |
| 20117700 | Vision improvement and reduction in falls after expedited cataract surgery: systematic review and meta-analysis                                            | cataract surgery AND (vision improvement OR fall* OR visual acuity) | 19370674 |
| 20138011 | Adjunctive dexamethasone in bacterial meningitis                                                                                                           | (dexamethasone OR corticosteroid*) AND bacterial meningitis         | 20824838 |
|          |                                                                                                                                                            |                                                                     | 19475753 |
|          |                                                                                                                                                            |                                                                     | 19411436 |
|          |                                                                                                                                                            |                                                                     | 9302246  |

|          |                                                                                                                                        |                                                                                                         |          |
|----------|----------------------------------------------------------------------------------------------------------------------------------------|---------------------------------------------------------------------------------------------------------|----------|
|          |                                                                                                                                        |                                                                                                         | 1413739  |
| 20156911 | Prophylactic antibiotics for burns patients                                                                                            | antibiotics AND burns                                                                                   | NO       |
| 20176986 | Statins for the primary prevention of cardiovascular events in women with elevated high-sensitivity C-reactive protein or dyslipidemia | statin* AND (women OR female) AND (primary prevention)                                                  | 18793814 |
|          |                                                                                                                                        |                                                                                                         | 17355737 |
|          |                                                                                                                                        |                                                                                                         | 22300691 |
| 20187106 | Peginterferon alpha-2a is associated with higher sustained virological response than peginterferon alfa-2b in chronic hepatitis C      | (interferon OR peginterferon) AND hepatitis C AND virological response                                  | 20974315 |
| 20206780 | Randomized trials of dopamine agonists in restless legs syndrome                                                                       | dopamine agonists AND restless legs syndrome                                                            | 21412893 |
|          |                                                                                                                                        |                                                                                                         | 19249945 |
|          |                                                                                                                                        |                                                                                                         | 18474889 |
|          |                                                                                                                                        |                                                                                                         | 18226947 |
| 20238328 | Non-surgical interventions for eosinophilic esophagitis                                                                                | eosinophilic esophagitis AND treatment                                                                  | NO       |
| 20238344 | Combined use of hyperthermia and radiation therapy for treating locally advanced cervix carcinoma                                      | hyperthermia AND (radiation therapy OR radiotherapy) AND (cervical OR cervix) AND (cancer or carcinoma) | NO       |
| 20238357 | Vaginal preparation with antiseptic solution before cesarean section for preventing postoperative infections                           | antisept* AND cesarean                                                                                  | NO       |
| 20348121 | Water, sanitation and hygiene for the prevention of diarrhoea                                                                          | (water OR sanit* OR hygiene) AND diarrhea                                                               | 20620115 |

|          |                                                                                                                                                                                 |                                                                                                                                                             |          |
|----------|---------------------------------------------------------------------------------------------------------------------------------------------------------------------------------|-------------------------------------------------------------------------------------------------------------------------------------------------------------|----------|
|          |                                                                                                                                                                                 |                                                                                                                                                             | 18254044 |
|          |                                                                                                                                                                                 |                                                                                                                                                             | 17353208 |
| 20359842 | Long-term outcome of a routine versus selective invasive strategy in patients with non-ST-segment elevation acute coronary syndrome: a meta-analysis of individual patient data | (revascularization OR angiography OR intervention OR invasive) AND (non-St-Segment OR Non-St-elevation OR NSTEMACS OR NSTEM-ACS) AND (routine OR selective) | 20238333 |
|          |                                                                                                                                                                                 |                                                                                                                                                             | 15956636 |
|          |                                                                                                                                                                                 |                                                                                                                                                             | 15050484 |
| 20380651 | Bioengineered skin in diabetic foot ulcers                                                                                                                                      | bioengineered skin AND diabet* AND (foot OR feet)                                                                                                           | NO       |
| 20381820 | Effect of statins on atrial fibrillation after cardiac surgery: a duration- and dose-response meta-analysis.                                                                    | statin* AND atrial fibrillation AND cardiac surgery                                                                                                         | 21108566 |
|          |                                                                                                                                                                                 |                                                                                                                                                             | 20825761 |
|          |                                                                                                                                                                                 |                                                                                                                                                             | 20069076 |
|          |                                                                                                                                                                                 |                                                                                                                                                             | 19698856 |
|          |                                                                                                                                                                                 |                                                                                                                                                             | 19559266 |
|          |                                                                                                                                                                                 |                                                                                                                                                             | 18506053 |
|          |                                                                                                                                                                                 |                                                                                                                                                             | 18294568 |
|          |                                                                                                                                                                                 |                                                                                                                                                             | 22351917 |
|          |                                                                                                                                                                                 |                                                                                                                                                             | 22376147 |
|          |                                                                                                                                                                                 |                                                                                                                                                             | 22513959 |
| 20393944 | Direct thrombin inhibitors versus vitamin K antagonists or low molecular weight heparins for                                                                                    | (thrombin inhibitor*) AND (vitamin K antagonist* OR                                                                                                         | 22744711 |

|          |                                                                                                    |                                                            |          |
|----------|----------------------------------------------------------------------------------------------------|------------------------------------------------------------|----------|
|          | prevention of venous thromboembolism following total hip or knee replacement                       | heparin) AND (hip OR knee)                                 |          |
| 20393958 | Single dose oral diflunisal for acute postoperative pain in adults                                 | diflunisal AND pain AND (post-operative OR postoperative)  | 21901726 |
| 20413038 | Efficacy and safety of drug-eluting stents in chronic total coronary occlusion recanalization      | drug-eluting AND stent* AND chronic total occlusion        | 20549695 |
|          |                                                                                                    |                                                            | 21419488 |
| 20418173 | Comparative efficacy and harms of duloxetine, milnacipran, and pregabalin in fibromyalgia syndrome | (duloxetine OR milnacipran OR pregabalin) AND fibromyalgia | 21054455 |
|          |                                                                                                    |                                                            | 20602781 |
|          |                                                                                                    |                                                            | 20056767 |
|          |                                                                                                    |                                                            | 19821395 |
|          |                                                                                                    |                                                            | 19588419 |
|          |                                                                                                    |                                                            | 19539427 |
|          |                                                                                                    |                                                            | 19533210 |
|          |                                                                                                    |                                                            | 17937567 |
|          |                                                                                                    |                                                            | 22452526 |
|          |                                                                                                    |                                                            | 22419330 |
|          |                                                                                                    |                                                            | 21078630 |
| 20440646 | The use of self-expanding stents in esophageal and gastroesophageal junction cancer palliation     | stent* AND (esophag* OR gastroesophag*) AND cancer         | 19821338 |

|          |                                                                                                                           |                                                                              |          |
|----------|---------------------------------------------------------------------------------------------------------------------------|------------------------------------------------------------------------------|----------|
| 20464729 | Methotrexate for primary biliary cirrhosis                                                                                | methotrexate AND primary biliary cirrhosis                                   | NO       |
| 20464742 | Indigenous healthcare worker involvement for Indigenous adults and children with asthma                                   | Indigenous healthcare worker AND asthma                                      | NO       |
| 20472172 | Time to treatment with intravenous alteplase and outcome in stroke                                                        | (alteplase OR tissue plasminogen activator) AND stroke                       | 21205237 |
|          |                                                                                                                           |                                                                              | 19478213 |
|          |                                                                                                                           |                                                                              | 19821269 |
| 20499236 | A systematic review and meta-analysis of rituximab-based immunochemotherapy for subtypes of diffuse large B cell lymphoma | rituximab AND diffuse large B cell lymphoma                                  | 19714523 |
| 20528806 | Computer-delivered interventions for alcohol and tobacco use                                                              | computer AND (alcohol* OR tobacco OR smoking)                                | 21083832 |
|          |                                                                                                                           |                                                                              | 20824856 |
|          |                                                                                                                           |                                                                              | 19832783 |
|          |                                                                                                                           |                                                                              | 19468084 |
|          |                                                                                                                           |                                                                              | 23046909 |
| 20556757 | Interventions for cellulitis and erysipelas                                                                               | (cellulitis OR erysipelas) AND treatment                                     | NO       |
| 20556793 | Prevention of diarrhoea in children with HIV infection or exposure to maternal HIV infection                              | diarrhea AND (children OR pediatric) AND HIV                                 | NO       |
| 20569758 | Effect of folic acid, with or without other B vitamins, on cognitive decline                                              | (folic acid OR folate) AND (cognit* OR dementia)                             | NO       |
| 20571868 | Pharmacological interventions for fertility preservation during chemotherapy                                              | (infertility OR fertility) AND (prevention OR preservation) AND chemotherapy | 21145541 |

|          |                                                                                                                                                                       |                                                                                                           |          |
|----------|-----------------------------------------------------------------------------------------------------------------------------------------------------------------------|-----------------------------------------------------------------------------------------------------------|----------|
|          |                                                                                                                                                                       |                                                                                                           | 21048441 |
|          |                                                                                                                                                                       |                                                                                                           | 19281314 |
| 20581723 | Effects of soy isoflavones and genistein on glucose metabolism in perimenopausal and postmenopausal non-Asian women: a meta-analysis of randomized controlled trials. | (isoflavone OR genistein) AND glucose AND menopause                                                       | NO       |
| 20594533 | Chemoprevention of colorectal cancer                                                                                                                                  | (NSAID OR aspirin OR folic acid OR calcium OR vitamin D OR antioxidants) prevention AND colorectal cancer | 20685491 |
|          |                                                                                                                                                                       |                                                                                                           | 20363687 |
|          |                                                                                                                                                                       |                                                                                                           | 20085565 |
|          |                                                                                                                                                                       |                                                                                                           | 19757214 |
|          |                                                                                                                                                                       |                                                                                                           | 19211452 |
|          |                                                                                                                                                                       |                                                                                                           | 19055515 |
|          |                                                                                                                                                                       |                                                                                                           | 18254022 |
|          |                                                                                                                                                                       |                                                                                                           | 17923032 |
|          |                                                                                                                                                                       |                                                                                                           | 22566300 |
|          |                                                                                                                                                                       |                                                                                                           | 16842454 |
|          |                                                                                                                                                                       |                                                                                                           | 15667497 |
|          |                                                                                                                                                                       |                                                                                                           | 15464182 |
| 20614461 | High dose rate versus low dose rate intracavity brachytherapy for locally advanced uterine cervix cancer                                                              | brachytherapy AND (cervical OR cervix) AND (cancer OR carcinoma)                                          | 19344527 |



|          |                                                                                                            |                                                                                                   |          |
|----------|------------------------------------------------------------------------------------------------------------|---------------------------------------------------------------------------------------------------|----------|
| 20614469 | Tocilizumab for rheumatoid arthritis                                                                       | tocilizumab AND rheumatoid arthritis                                                              | 21239748 |
|          |                                                                                                            |                                                                                                   | 21097801 |
|          |                                                                                                            |                                                                                                   | 19936725 |
| 20626892 | Updating the evidence for the role of corticosteroids in severe sepsis and septic shock                    | corticosteroids AND (sepsis OR septic shock)                                                      | 19509383 |
|          |                                                                                                            |                                                                                                   | 19489712 |
|          |                                                                                                            |                                                                                                   | 15289273 |
|          |                                                                                                            |                                                                                                   | 7634816  |
|          |                                                                                                            |                                                                                                   | 7600840  |
| 20665885 | Continued chemotherapy after complete response to primary therapy among women with advanced ovarian cancer | ovarian cancer AND (continued OR repeat) AND chemotherapy                                         | NO       |
| 20675312 | Antibiotics for preventing progression of abdominal aortic aneurysms                                       | antibiotics AND abdominal aortic aneurysm                                                         | 18365027 |
|          |                                                                                                            |                                                                                                   | 22972146 |
| 20687063 | Antibiotics for preterm rupture of membranes                                                               | antibiotic* AND (preterm rupture of membranes OR preterm birth)                                   | 20348116 |
|          |                                                                                                            |                                                                                                   | 18973872 |
|          |                                                                                                            |                                                                                                   | 8623790  |
| 20688009 | Sugammadex for the reversal of muscle relaxation in general anaesthesia                                    | sugammadex AND (anesthesia OR anaesthesia)                                                        | 19821409 |
| 20709722 | Optimal timing of coronary angiography and potential intervention in non-ST-elevation acute coronary       | (timing OR early OR delayed OR deferred) AND (revascularization OR angiography OR intervention OR | 21872193 |

|          |                                                                                                                                               |                                                                                         |          |
|----------|-----------------------------------------------------------------------------------------------------------------------------------------------|-----------------------------------------------------------------------------------------|----------|
|          | syndromes                                                                                                                                     | invasive) AND (non-St-Segment OR Non-St-elevation OR NSTEMI OR NSTEMI-ACS)              |          |
|          |                                                                                                                                               |                                                                                         | 21262739 |
|          |                                                                                                                                               |                                                                                         | 23420234 |
| 20802426 | The efficacy of treatment for systemic sclerosis interstitial lung disease: results from a meta-analysis                                      | systemic sclerosis AND lung disease AND treatment                                       | 18937831 |
|          |                                                                                                                                               |                                                                                         | 17901091 |
| 20824832 | Antibiotic prophylaxis for cirrhotic patients with upper gastrointestinal bleeding                                                            | antibiotic* AND gastrointestinal bleeding AND cirrho*                                   | 21707680 |
|          |                                                                                                                                               |                                                                                         | 10347104 |
| 20824866 | Antiemetic medication for prevention and treatment of chemotherapy induced nausea and vomiting in childhood                                   | antiemetic AND chemotherapy AND (child* OR pediatric)                                   | NO       |
| 20927747 | Hand assisted laparoscopic surgery versus conventional laparoscopy for colorectal surgery                                                     | (Hand-assisted OR hand assisted) AND laparoscop* AND colorectal AND meta-analysis[ptyp] | 18437486 |
| 20927748 | Zotepine versus other atypical antipsychotics for schizophrenia.                                                                              | zotepine AND schizophrenia                                                              | 19015230 |
| 20927769 | Antibiotic adjuvant therapy for pulmonary infection in cystic fibrosis                                                                        | (carotene OR zinc OR garlic) AND cystic fibrosis                                        | 21154377 |
| 20937042 | Meta-analysis: re-treatment of genotype I hepatitis C nonresponders and relapsers after failing interferon and ribavirin combination therapy. | hepatitis C AND (retreatment OR re-treatment)                                           | 20857094 |
| 20946476 | The effectiveness of self-directed learning in health professions education                                                                   | self-directed learning AND education                                                    | NO       |

|          |                                                                                                                                                                                                                   |                                                                                                              |          |
|----------|-------------------------------------------------------------------------------------------------------------------------------------------------------------------------------------------------------------------|--------------------------------------------------------------------------------------------------------------|----------|
| 20956647 | Pityriasis versicolor: a systematic review of interventions.                                                                                                                                                      | Pityriasis versicolor AND treatment                                                                          | NO       |
| 20974315 | A comparison of peginterferon alpha-2a and alpha-2b for treatment-naïve patients with chronic hepatitis C virus                                                                                                   | peginterferon AND hepatitis C AND 2a AND 2b                                                                  | 21643737 |
|          |                                                                                                                                                                                                                   |                                                                                                              | 20187106 |
| 21029469 | Reduction of diabetes risk in routine clinical practice: are physical activity and nutrition interventions feasible and are the outcomes from reference trials replicable? A systematic review and meta-analysis. | (prevent* OR delay* OR risk reduction) AND diabetes AND (physical activity OR nutrition OR diet OR exercise) | 18646086 |
|          |                                                                                                                                                                                                                   |                                                                                                              | 16249558 |
| 21069705 | Recombinant human thyrotropin (rhTSH) aided radioiodine treatment for residual or metastatic differentiated thyroid cancer                                                                                        | (Recombinant human thyrotropin OR rhTSH) AND cancer                                                          | NO       |
| 21090838 | A pooled analysis of lacosamide clinical trial data grouped by mechanism of action of concomitant antiepileptic drugs                                                                                             | lacosamide AND epilep*                                                                                       | 21729036 |
| 21114345 | Dialectical behavior therapy for borderline personality disorder                                                                                                                                                  | Dialectical behavior therapy AND borderline personality                                                      | NO       |
| 21154346 | Inhaled nitric oxide for respiratory failure in preterm infants                                                                                                                                                   | nitric oxide AND respiratory (failure OR distress) AND (infants OR newborns OR neonates)                     | 21930540 |
|          |                                                                                                                                                                                                                   |                                                                                                              | 16506103 |
|          |                                                                                                                                                                                                                   |                                                                                                              | 10765508 |
| 21154360 | Antibiotic prophylaxis for patients undergoing elective laparoscopic cholecystectomy                                                                                                                              | antibiotic* AND laparoscop* AND cholecystectomy                                                              | 21443433 |

|          |                                                                                 |                                        |          |
|----------|---------------------------------------------------------------------------------|----------------------------------------|----------|
|          |                                                                                 |                                        | 19236313 |
|          |                                                                                 |                                        | 18780131 |
|          |                                                                                 |                                        | 14752639 |
| 21154374 | Altered dietary salt intake for preventing and treating diabetic kidney disease | salt AND (renal OR kidney) AND diabet* | NO       |
| 21203440 | Pharmacological treatment of painful HIV-associated sensory neuropathy          | HIV AND neuropath*                     | 21328280 |
|          |                                                                                 |                                        | 17943857 |
|          |                                                                                 |                                        | 23235657 |
